# Supplementary material
Source: PubMed Central journal article supplement (PMC1976233)

**A**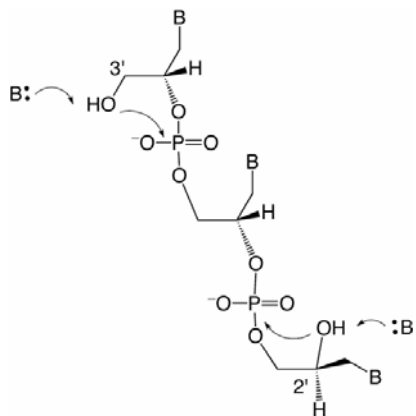**B**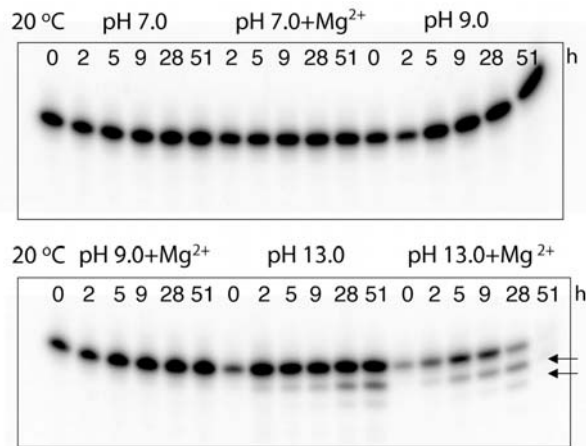**Sequence:**

5'- [<sup>32</sup>P]-TAA TAC GAC TCA CTA TAG GG t a t-2'

**C**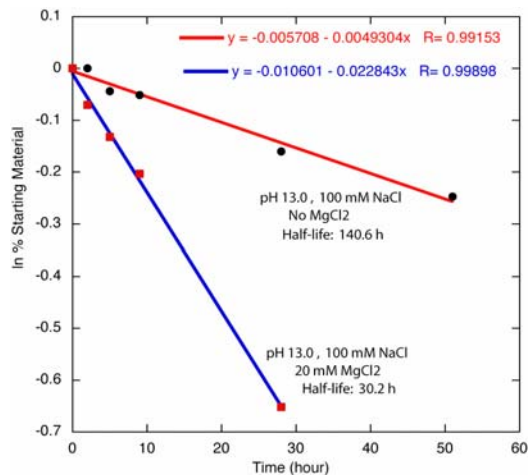

Supplement: pnas_0704211104_1.pdf [file pnas_0704211104_1.pdf]

A

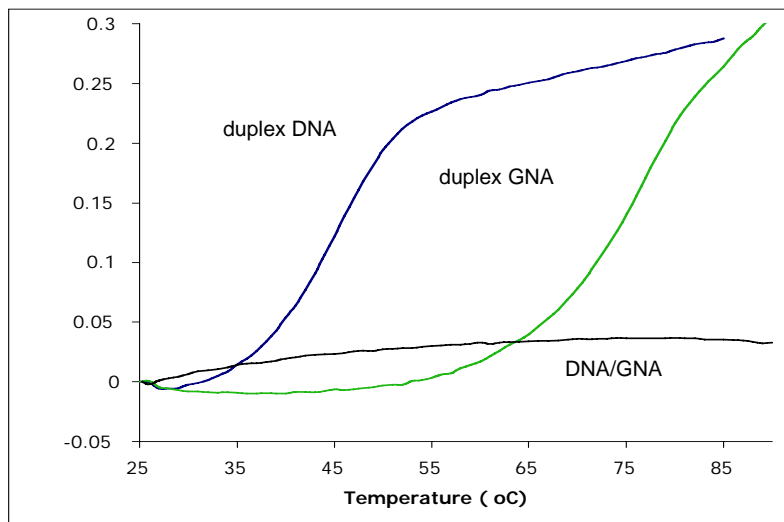

B.

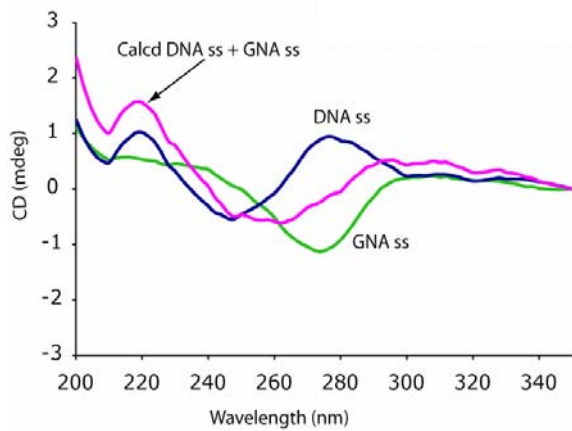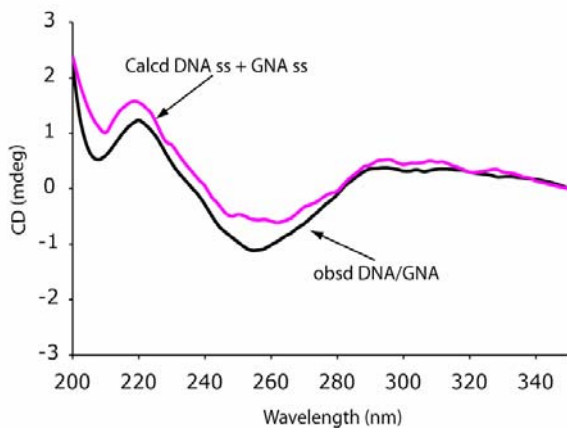

Supplement: pnas_0704211104_2.pdf [file pnas_0704211104_2.pdf]

A

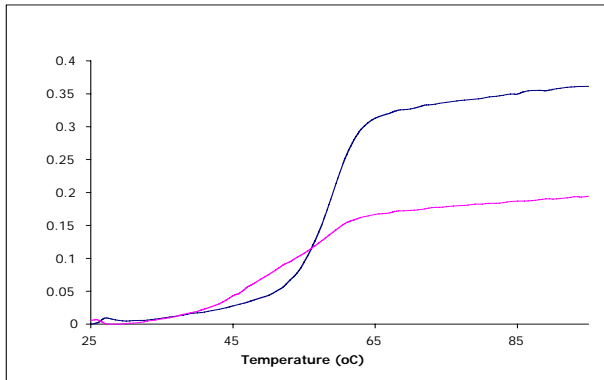

B

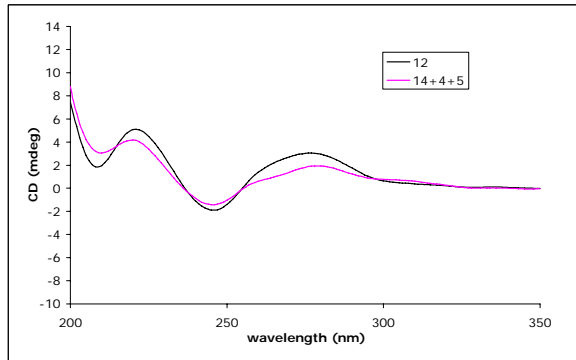

Supplement: pnas_0704211104_3.pdf [file pnas_0704211104_3.pdf]
